# Supplementary material for: Postnatal Development of Microglia-Like Cells in Mouse Cochlea
Source: Neural Plast. 2018 Jul 31;2018:1970150. doi: 10.1155/2018/1970150 (PMC6091412; doi:10.1155/2018/1970150)
Supplement: Supplementary 1 — Supplementary Figure 1: localization of type I, II, III, and IV fibrocytes in the lateral wall of the cochlea. [file 1970150.f1.xps]

Archive with 11 entries (11 files):
- [Content_Types].xml
- _rels/.rels
- docProps/thumbnail.jpeg
- docProps/core.xml
- FixedDocSeq.fdseq
- Documents/1/Pages/_rels/1.fpage.rels
- Documents/1/_rels/FixedDoc.fdoc.rels
- Documents/1/FixedDoc.fdoc
- Resources/Images/image_0.jpg
- Documents/1/Pages/1.fpage
- Documents/1/Structure/DocStructure.struct
