# Supplementary material for: Postnatal Development of Microglia-Like Cells in Mouse Cochlea
Source: Neural Plast. 2018 Jul 31;2018:1970150. doi: 10.1155/2018/1970150 (PMC6091412; doi:10.1155/2018/1970150)
Supplement: Supplementary 1 — Supplementary Figure 1: localization of type I, II, III, and IV fibrocytes in the lateral wall of the cochlea. [file 1970150.f1.xps › [Content_Types].xml]

<?xml version="1.0" encoding="UTF-8" standalone="yes"?>
<Types xmlns="http://schemas.openxmlformats.org/package/2006/content-types"><Default Extension="jpeg" ContentType="image/jpeg"/><Default Extension="rels" ContentType="application/vnd.openxmlformats-package.relationships+xml"/><Default Extension="xml" ContentType="application/xml"/><Default Extension="fdseq" ContentType="application/vnd.ms-package.xps-fixeddocumentsequence+xml"/><Default Extension="fpage" ContentType="application/vnd.ms-package.xps-fixedpage+xml"/><Default Extension="struct" ContentType="application/vnd.ms-package.xps-documentstructure+xml"/><Default Extension="jpg" ContentType="image/jpeg"/><Default Extension="fdoc" ContentType="application/vnd.ms-package.xps-fixeddocument+xml"/><Override PartName="/docProps/core.xml" ContentType="application/vnd.openxmlformats-package.core-properties+xml"/></Types>
