# Supplementary material for: Postnatal Development of Microglia-Like Cells in Mouse Cochlea
Source: Neural Plast. 2018 Jul 31;2018:1970150. doi: 10.1155/2018/1970150 (PMC6091412; doi:10.1155/2018/1970150)
Supplement: Supplementary 1 — Supplementary Figure 1: localization of type I, II, III, and IV fibrocytes in the lateral wall of the cochlea. [file 1970150.f1.xps › docProps/core.xml]

<?xml version="1.0" encoding="UTF-8" standalone="yes"?>
<cp:coreProperties xmlns:cp="http://schemas.openxmlformats.org/package/2006/metadata/core-properties" xmlns:dc="http://purl.org/dc/elements/1.1/" xmlns:dcterms="http://purl.org/dc/terms/" xmlns:dcmitype="http://purl.org/dc/dcmitype/" xmlns:xsi="http://www.w3.org/2001/XMLSchema-instance"><dcterms:created xsi:type="dcterms:W3CDTF">2018-07-10T17:13:03Z</dcterms:created><dcterms:modified xsi:type="dcterms:W3CDTF">2018-07-10T17:13:03Z</dcterms:modified></cp:coreProperties>
