# Supplementary material for: Postnatal Development of Microglia-Like Cells in Mouse Cochlea
Source: Neural Plast. 2018 Jul 31;2018:1970150. doi: 10.1155/2018/1970150 (PMC6091412; doi:10.1155/2018/1970150)
Supplement: Supplementary 1 — Supplementary Figure 1: localization of type I, II, III, and IV fibrocytes in the lateral wall of the cochlea. [file 1970150.f1.xps › Documents/1/Pages/_rels/1.fpage.rels]

<?xml version="1.0" encoding="UTF-8" standalone="yes"?>
<Relationships xmlns="http://schemas.openxmlformats.org/package/2006/relationships"><Relationship Id="rId1" Type="http://schemas.microsoft.com/xps/2005/06/required-resource" Target="../../../Resources/Images/image_0.jpg"/></Relationships>
